# Supplementary material
Source: Springer Nature journal article supplement (https://www.springermedizin.de/resource/supplementary/12992_2009_67_MOESM1_ESM.pdf/9616384)

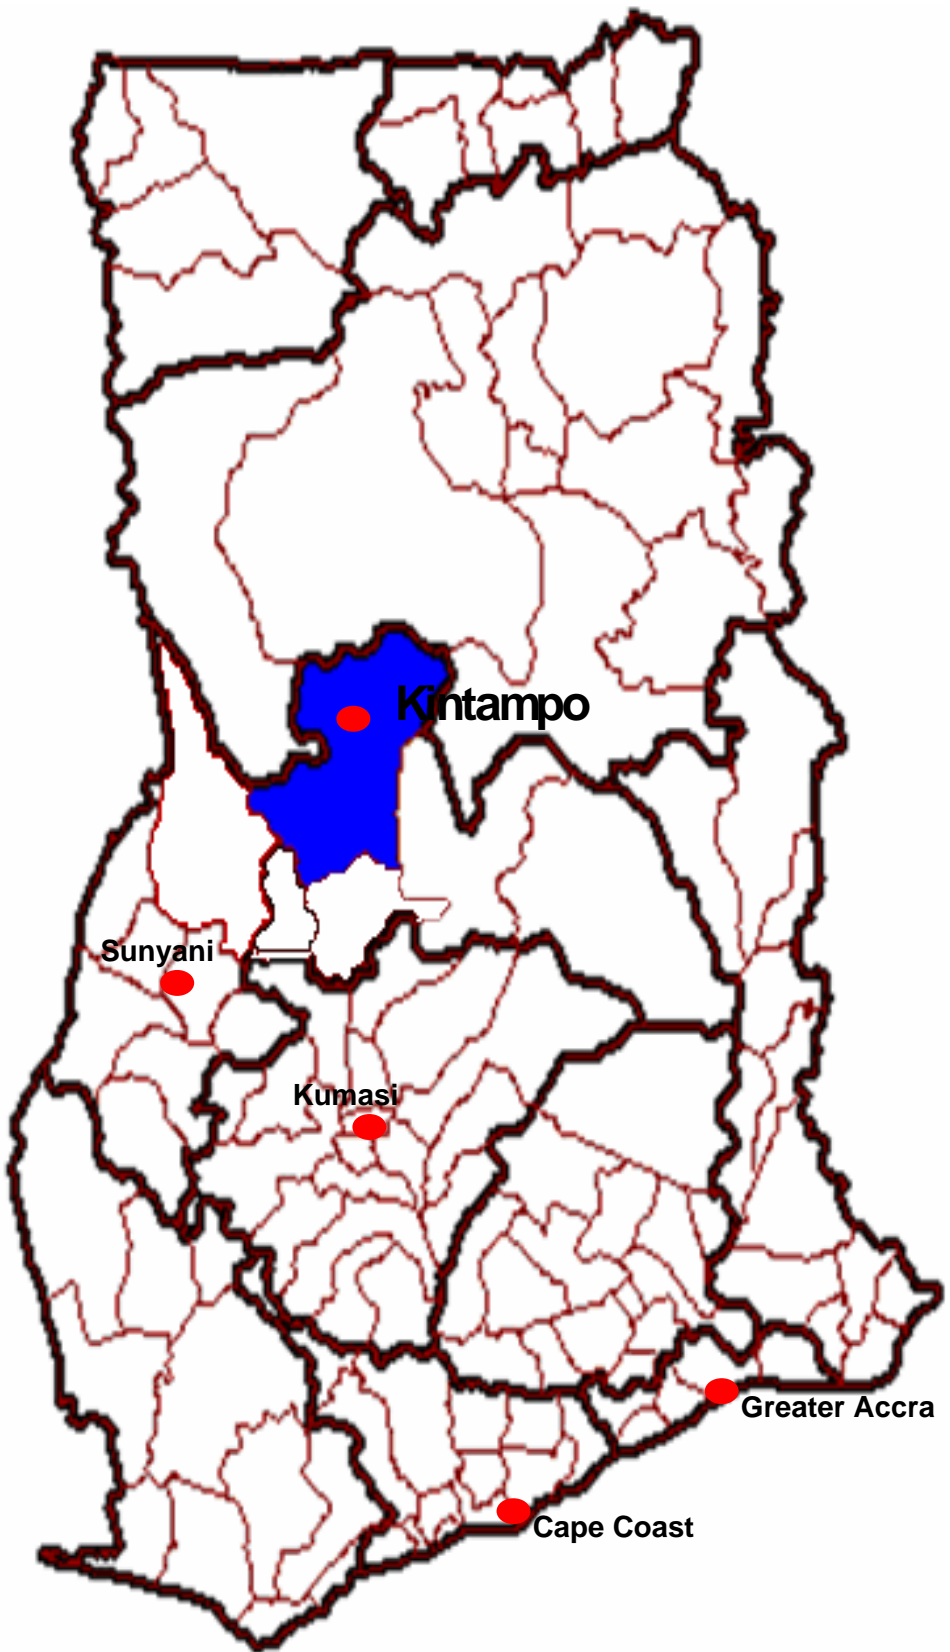

**Kintampo**

**Sunyani**

**Kumasi**

**Cape Coast**

**Greater Accra**

Supplement: MOESM1 [file 9616384]
